# Supplementary material for: An electrospinning strategy to fabricate an integrated electrode with multiple components for highly efficient electrocatalytic water splitting
Source: Royal Society of Chemistry journal article supplement (doi:10.1039/d3nj04285e), 2023-01-01
Supplement: d3nj04285e1.pdf [file d3nj04285e1.pdf]

## Supporting Information

### **An electrospinning strategy to fabricate integrated electrode with multiple components for highly efficient electrocatalytic water splitting**

Jian Cai, Jiace Hao, Shuanglong Lu, Fang Duan, Mingliang Du, Han Zhu\*

Key Laboratory of Synthetic and Biological Colloids, Ministry of Education, School of Chemical and Material Engineering, Jiangnan University, Wuxi 214122, P. R. China

E-mail: zhysw@jiangnan.edu.cn

#### **Experimental section**

##### **Materials**

Copper chloride ( $\text{CuCl}_2$ ), cobalt chloride hexahydrate ( $\text{CoCl}_2 \cdot 6\text{H}_2\text{O}$ ), manganous acetate ( $\text{Mn}(\text{CH}_3\text{COO})_2$ ) were purchased from Aladdin Co., Ltd. Sulfuric acid ( $\text{H}_2\text{SO}_4$ ), potassium hydroxide (KOH) and dimethylformamide (DMF, 99.5%) were supplied by Shanghai Civi Chemical Technology Co., Ltd. Polyacrylonitrile (PAN,  $M \approx 1.4 \times 10^5$ , copolymerized with 10 wt% methyl acrylate) was manufactured by Sinopec Shanghai Petrochemical Co., Ltd. Ultrapure water (Milli-Q) was used in all experiments. All of the reagents were used without purification.

##### **Preparation of CuCoMn salt/PAN precursor nanofibers**

First, 3g PAN powder were dissolved in 22g DMF to form a homogeneous solution under stirring for 2h. Then, 0.15g  $\text{CuCl}_2$ , 0.15g  $\text{CoCl}_2$  and 0.15g  $\text{Mn}(\text{CH}_3\text{COO})_2$  were added in the above mixture under stirring for 2h. After that, the prepared mixture was transferred into a syringe, equipping on the injection pump. The speed of the injection was 0.6 mL/h, and the voltage applied was fixed at 16 kV. Under these conditions, the CuCoMn salt/PAN precursor nanofibers were collected on the rotating drum.

##### **Preparation of CuCo-MnO@CNTs/CNFs 3D architecture**

The CuCoMn salt/PAN precursor nanofibers were put on a home-built chemical vapor deposition furnace for the  $\text{NH}_3$ -assisted graphitization. The temperature was

firstly heated to 280 °C from room temperature and maintained at 280 °C for 3h. Subsequently, the temperature of the furnace was further heated to 1000 °C under Ar atmosphere with heating rate of 5 °C min<sup>-1</sup>. Finally, the samples were stabilized at 1000 °C under NH<sub>3</sub>/Ar atmosphere for 3h. In comparison, the CuCo-MnO@CNTs/CNFs were prepared with different flow rates of NH<sub>3</sub> (0, 1, 3 and 5 sccm). The control CNFs were prepared without metallic salts in the same process.

### **Instrumentation**

Field-emission scanning electron microscope (FE-SEM) images were carried out using a JEOL JSM-6700F with acceleration voltage of 3 kV. Crystal structure and selected-area electron diffraction (SAED) were conducted on a transmission electron microscopy (TEM) with acceleration voltage of 200 kV. Elemental mapping, high-angle annular dark field scanning TEM (HAADF-STEM) and lines-scan energy dispersive X-ray spectroscopy (EDX) were recorded on a STEM (Tecnai G2 F30 S-Twin, Philips-FEI) at an acceleration voltage of 300 kV. X-ray diffraction (XRD) patterns of the samples were performed on a SIEMENS Diffractometer D5000 X-ray diffractometer using Cu K<sub>α</sub> radiation ( $\lambda=1.5406 \text{ \AA}$ ) source at 35 kV, with a scan rate of 0.02° 2 $\theta$  s<sup>-1</sup> in the 2 $\theta$  range of 20-60°. In addition, Surface chemical composition of samples were measured by a Kratos Axis Ultra DLD X-ray photoelectron spectrometer (XPS) with an aluminum (mono) K<sub>α</sub> source (1486.6 eV).

### **Electrochemical performance**

Electrochemical performance of the as-synthesized catalysts were performed on an IVIUM electrochemical workstation (Ivium Technologies BV Company, Netherlands) at room temperature. The as-prepared catalysts directly used as the working electrodes without binder in a standard three-electrode system. A saturated calomel electrode (SCE) and the graphite rod were used as the reference electrode and counter electrode. Pt/C and RuO<sub>2</sub> were taken as controls and deposited on glassy carbon electrode (GCE) with diameter of 3 mm for measurement. To prepare the electrocatalyst ink, 3 mg of electrocatalyst was dispersed into 1 mL mixed solvent with a volume ratio of V<sub>isopropanol</sub>:V<sub>water</sub>=3:1. after 30 min of ultrasonication, 25  $\mu$ L nafion 117 solution was added. After another 30 min for ultrasonication, 5  $\mu$ L

electrocatalyst ink was casted on GCE and dried in the air naturally. The cyclic voltammetry curves, the polarization curves and the current-time curves were carried out in 0.5 M  $\text{H}_2\text{SO}_4$  (pH=0) and 1.0 M KOH (pH=14), respectively. In addition, electrochemical impedance spectra (EIS) were performed in acid environment and the frequency range of the EIS from 100 kHz to 0.001 Hz. The time dependent current density ( $i$ - $t$ ) curves were examined in acid environment at 0.033 V vs. RHE and in alkaline environment at 1.48 V vs. RHE for 50h, respectively.

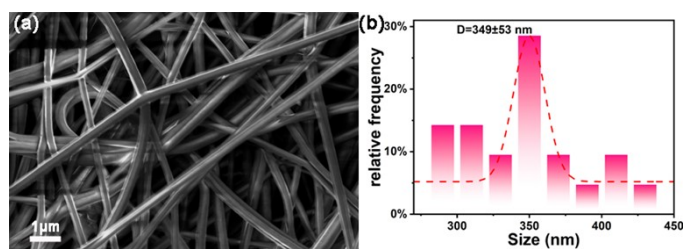

**Fig. S1.** (a) SEM image and (b) the corresponding diameter distribution of CuCoMn salt/PAN precursor nanofibers.

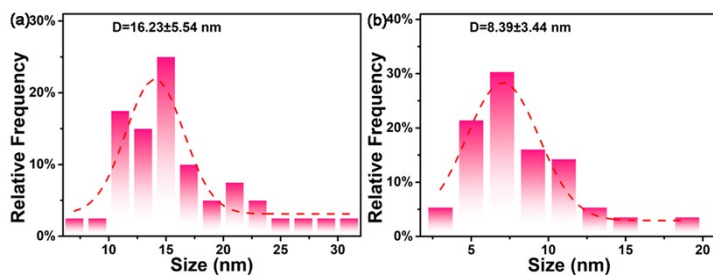

**Fig. S2.** (a) The inner diameter distribution and (b) the wall thickness distribution of CNTs in CuCo-MnO@CNTs/CNFs.

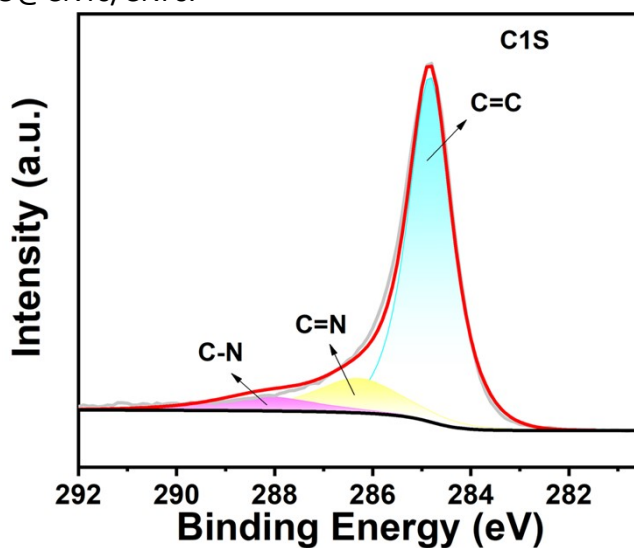

**Fig. S3.** C 1s XPS spectra of CuCo-MnO@CNTs/CNFs.

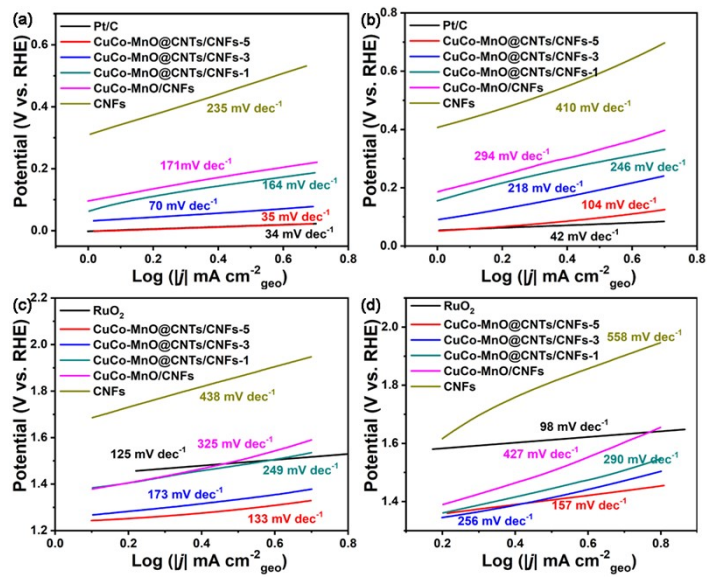

**Fig. S4.** Tafel slopes of commercial Pt/C, CuCo-MnO@CNTs/CNFs-5, CuCo-MnO@CNTs/CNFs-3, CuCo-MnO@CNTs/CNFs-1, CuCo-MnO/CNFs and CNFs in (a) 0.5 M H<sub>2</sub>SO<sub>4</sub> and (b) 1 M KOH for HER. Tafel slopes of various samples in (c) 0.5 M H<sub>2</sub>SO<sub>4</sub> and (d) 1 M KOH for OER.

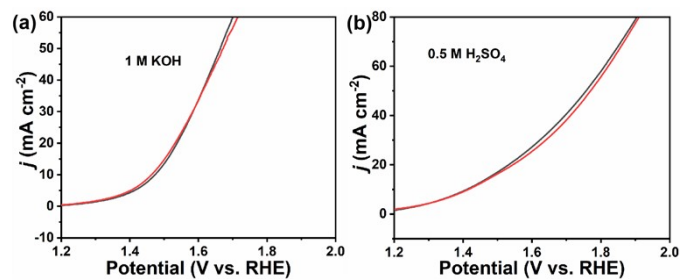

**Fig. S5** LSV curves of CuCo-MnO@CNTs/CNFs-5 tested at different times in (a) 1 M KOH and (b) 0.5 M H<sub>2</sub>SO<sub>4</sub> for OER.

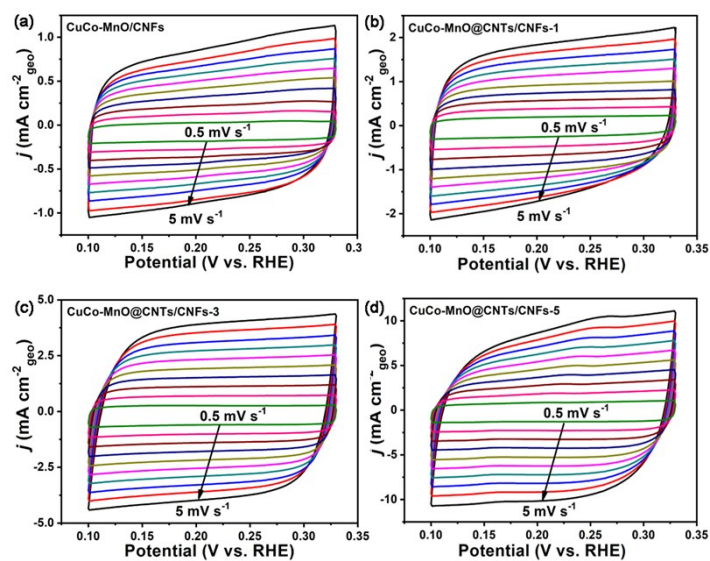

**Fig. S6.** CV curves of (a) CuCo-MnO/CNFs, (b) CuCo-MnO@CNTs/CNFs-1, (c) CuCo-MnO@CNTs/CNFs-3, (d) CuCo-MnO@CNTs/CNFs-5 at different scan rates.

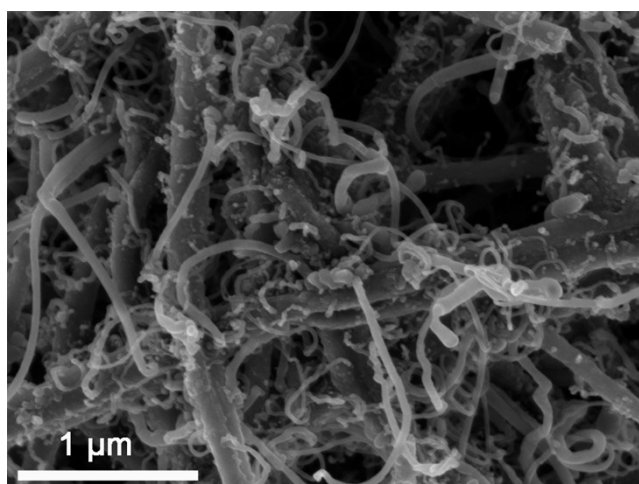

**Fig. S7** SEM image of CuCo-MnO@CNTs/CNFs-5 after i-t test.

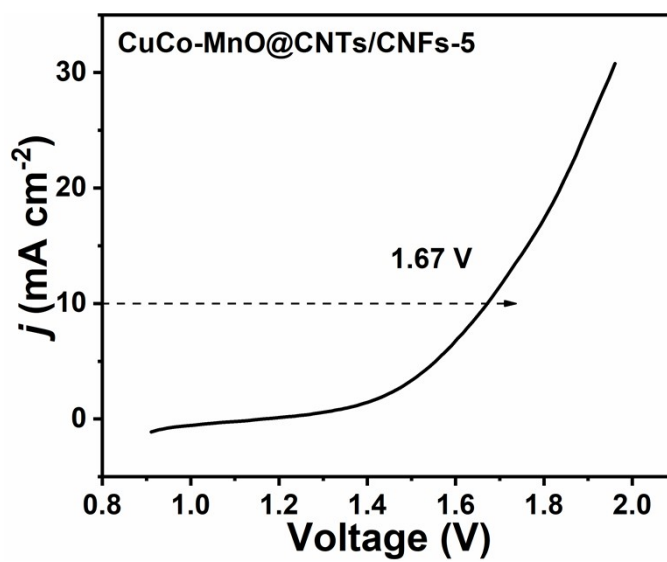

**Fig. S8.** LSV curve of CuCo-MnO@CNTs/CNFs-5||CuCo-MnO@CNTs/CNFs-5 electrode for water splitting in 1M KOH.
